# Supplementary material for: MARVEL, a Tool for Prediction of Bacteriophage Sequences in Metagenomic Bins
Source: PubMed Central journal article supplement (PMC6090037; doi:10.3389/fgene.2018.00304), 2018-08-07
Supplement: Image_1.pdf [file Image_1.pdf]

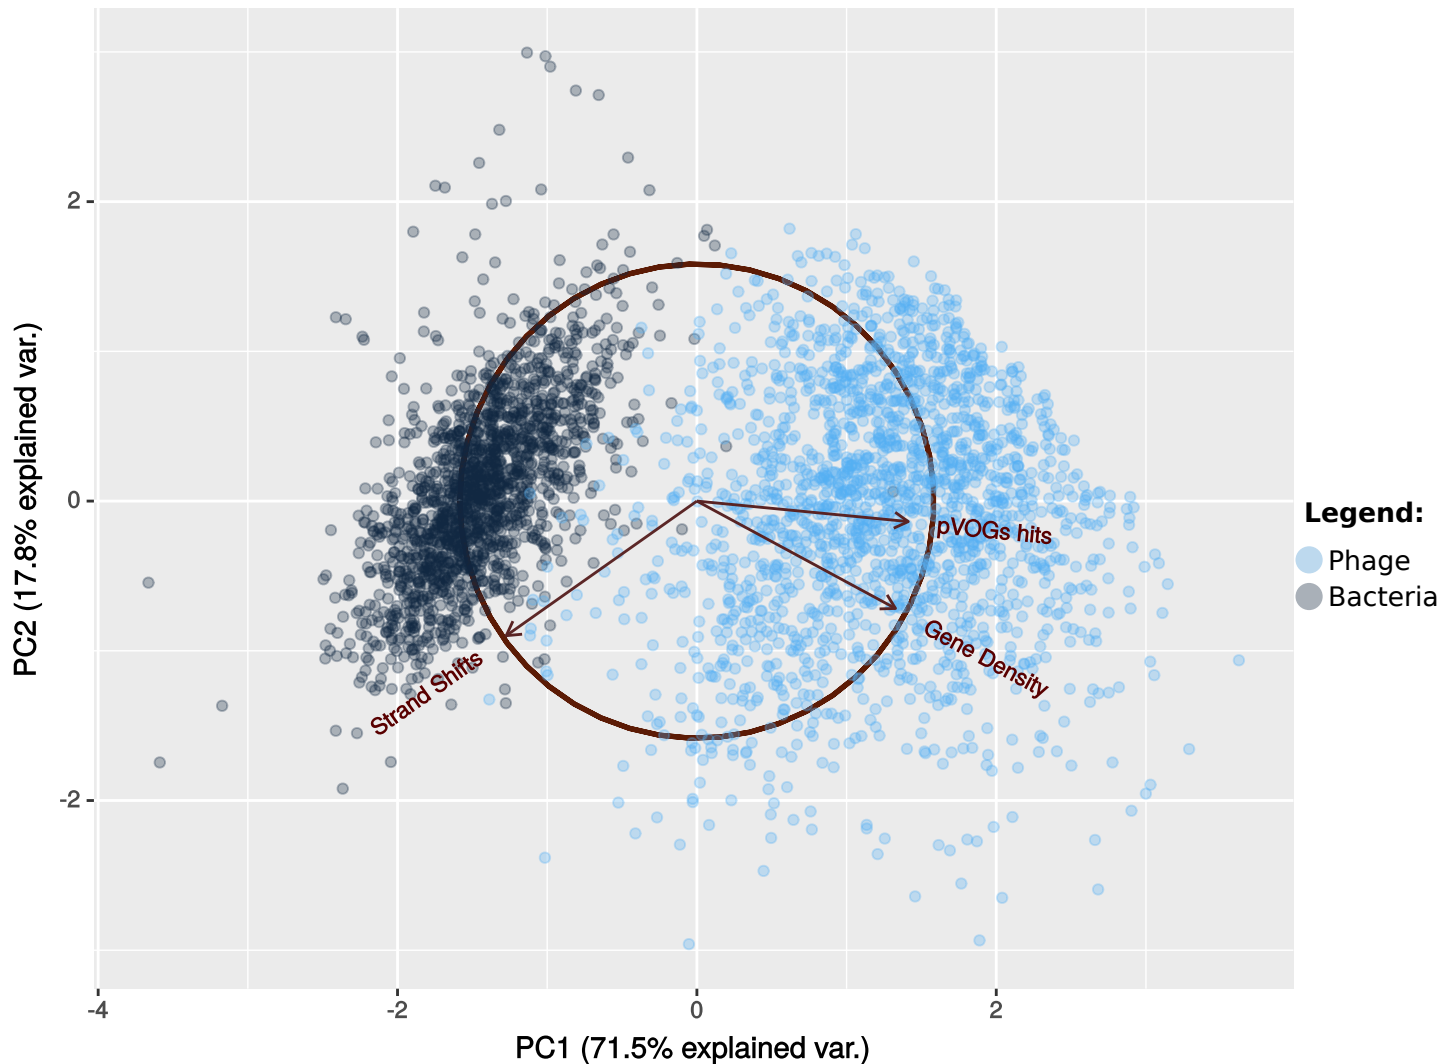

**Figure S1:** Principal Component Analysis using the three features implemented in MARVEL's Random Forest classifier. The first and second component explain 89% of the variation and each feature contributes proportionally to the length of its vector shown within the circle. Feature values were scaled and centered and PCA analysis was performed with `pcomp()` function from R.
